# Supplementary material for: Evolution of neuropeptide signalling systems
Source: Oxford University Press journal article supplement (doi:10.1242/jeb.151092), 2018-02-01
Supplement: jeb151092supp.pdf [file jeb151092supp.pdf]

## Table S1

[Click here to Download Table S1](#)
